# Supplementary material
Source: PubMed Central journal article supplement (PMC3725941)
Supplement: Supp_Table1.pdf [file Supp_Table1.pdf]

## Supplementary Data

SUPPLEMENTARY TABLE S1. DESCRIPTION OF THE CpG MOTIFS IN PLASMIDS phGfΔG, ph2pΔG, AND ph3pΔG

| <i>Plasmid</i> | <i>Strand</i> | <i>Island length (bp)</i> | <i>Localization (from bp to bp)</i> |
|----------------|---------------|---------------------------|-------------------------------------|
| phGfΔG         | Coding        | 765                       | 158–922                             |
|                |               | 222                       | 1664–1885                           |
|                |               | 254                       | 2247–2500                           |
|                |               | 420                       | 3631–4050                           |
|                | Complementary | 873                       | 50–922                              |
|                |               | 222                       | 1664–1885                           |
|                |               | 254                       | 2247–2500                           |
|                |               | 585                       | 3466–4050                           |
| ph2pΔG         | Coding        | 765                       | 158–922                             |
|                |               | 241                       | 1062–1302                           |
|                |               | 669                       | 1304–1972                           |
|                |               | 420                       | 2955–3374                           |
|                | Complementary | 873                       | 50–922                              |
|                |               | 1084                      | 936–2019                            |
|                |               | 585                       | 2790–3374                           |
|                |               | ph3pΔG                    | Coding                              |
| 420            | 2591–3010     |                           |                                     |
| Complementary  | 1606          |                           | 50–1655                             |
|                | 585           |                           | 2426–3010                           |
