# Supplementary material
Source: PubMed Central journal article supplement (PMC3725941)
Supplement: Supp_Table2.pdf [file Supp_Table2.pdf]

SUPPLEMENTARY TABLE S2. DESCRIPTION OF THE *HpaII* PREDICTED CUTS WITHIN THE DNA PLASMIDS

| <i>phGfΔG</i>                                |                        | <i>ph2pΔG</i>                                |                        | <i>ph3pΔG</i>                                |                        |
|----------------------------------------------|------------------------|----------------------------------------------|------------------------|----------------------------------------------|------------------------|
| <i>Fragment position<br/>(from bp to bp)</i> | <i>Length<br/>(bp)</i> | <i>Fragment position<br/>(from bp to bp)</i> | <i>Length<br/>(bp)</i> | <i>Fragment position<br/>(from bp to bp)</i> | <i>Length<br/>(bp)</i> |
| 2414–3509                                    | 1096                   | 1830–2833                                    | 1004                   | 1466–2469                                    | 1004                   |
| 3873–4578                                    | 706                    | 3197–3902                                    | 706                    | 2833–3538                                    | 706                    |
| 4579–337                                     | 360                    | 1397–1829                                    | 433                    | 1033–1465                                    | 433                    |
| 538–1869                                     | 332                    | 3903–337                                     | 360                    | 3539–337                                     | 360                    |
| 1132–1367                                    | 236                    | 936–1244                                     | 309                    | 493–712                                      | 220                    |
| 493–712                                      | 220                    | 493–712                                      | 220                    | 2470–2659                                    | 190                    |
| 936–1131                                     | 196                    | 2834–3023                                    | 190                    | 2686–2832                                    | 147                    |
| 3510–3699                                    | 190                    | 1245–1396                                    | 152                    | 936–1032                                     | 97                     |
| 1870–2053                                    | 184                    | 3050–3196                                    | 147                    | 845–935                                      | 91                     |
| 3726–3872                                    | 147                    | 845–935                                      | 91                     | 713–800                                      | 88                     |
| 2148–2282                                    | 135                    | 713–800                                      | 88                     | 338–417                                      | 80                     |
| 1410–1537                                    | 128                    | 338–417                                      | 80                     | 418–492                                      | 75                     |
| 2054–2147                                    | 94                     | 418–492                                      | 75                     | 813–844                                      | 32                     |
| 845–935                                      | 91                     | 813–844                                      | 32                     | 2660–2685                                    | 26                     |
| 713–800                                      | 88                     | 3024–3049                                    | 26                     | 801–812                                      | 12                     |
| 338–417                                      | 80                     | 801–812                                      | 12                     |                                              |                        |
| 418–492                                      | 75                     |                                              |                        |                                              |                        |
| 2283–2353                                    | 71                     |                                              |                        |                                              |                        |
| 2354–2413                                    | 60                     |                                              |                        |                                              |                        |
| 1368–1409                                    | 42                     |                                              |                        |                                              |                        |
| 813–844                                      | 32                     |                                              |                        |                                              |                        |
| 3700–3725                                    | 26                     |                                              |                        |                                              |                        |
| 801–812                                      | 12                     |                                              |                        |                                              |                        |
