# Supplementary material
Source: PubMed Central journal article supplement (PMC3725941)
Supplement: Supp_Table3.pdf [file Supp_Table3.pdf]

SUPPLEMENTARY TABLE S3. EFFICIENCY OF TRANSFECTION FOR NUCLEOFECTION AND TURBOFECTION EXPERIMENTS

| <i>Plasmid name</i>                               | <i>Experiment 1</i> | <i>Experiment 2</i> | <i>Experiment 3</i> |
|---------------------------------------------------|---------------------|---------------------|---------------------|
| <i>Nucleofection of phGf-related plasmids</i>     |                     |                     |                     |
| phGf                                              | 25%                 | 27%                 | 30%                 |
| ph2pΔG                                            | 29%                 | 34%                 | 31%                 |
| Ph3pΔG                                            | 31%                 | 29%                 | 33%                 |
| <i>Nucleofection of pEGFP-N1-related plasmids</i> |                     |                     |                     |
| pEGFP-N1                                          | 37%                 | 39,2%               | N/A                 |
| VP2-EGFP                                          | 34%                 | 36%                 | N/A                 |
| VP3-EGFP                                          | 33%                 | 37%                 | N/A                 |
| <i>Turbofection of phGf-related plasmids</i>      |                     |                     |                     |
| phGf                                              | 16.5%               | 14.5%               | 16%                 |
| ph2pΔG                                            | 15%                 | 14.5%               | 18.5%               |
| Ph3pΔG                                            | 17%                 | 16.5%               | 15%                 |

The efficiency of transfection after nucleofection or turbofection of NIH 3T3 cells was evaluated 5 and 12 h post-transfection, respectively. Independent experiments were performed. Cell were fixed and stained using anti VP2-VP3 mouse polyclonal antibody (Forstová *et al.*, 1993) followed by Alexa 488 anti-mouse (Molecular probes) or using antibody against EGFP conjugated with Alexa 488 (Molecular probes).

N/A, not applicable.

Forstová, J., Krauzewicz, N., Wallace, S., Street, A.J., Dilworth, S.M., Beard, S., and Griffin, B.E. (1993). Cooperation of structural proteins during late events in the life cycle of polyomavirus. *J Virol* **67**, 1405–1413.
